# Supplementary material for: Pd cocatalyst on Sm-doped BiFeO3nanoparticles: synergetic effect of a Pd cocatalyst and samarium doping on photocatalysis
Source: Royal Society of Chemistry journal article supplement (doi:10.1039/c6ra01140c), 2016-01-01
Supplement: c6ra01140c1.pdf [file c6ra01140c1.pdf]

## Supplementary Information

### **Pd cocatalyst on Sm-doped BiFeO<sub>3</sub> nanoparticles: Synergetic effect of Pd cocatalyst and samarium doping on photocatalysis**

Sen Wang, Da Chen\*, Feng Niu, Ning Zhang, Laishun Qin\*, Yuexiang Huang

*College of Materials Science and Engineering, China Jiliang University, Hangzhou 310018, Zhejiang, P.R. China*

*Tel: +86-571-86835738, Fax: +86-571-86875694*

*Email: dchen\_80@hotmail.com; qinlaishun@cjlu.edu.cn*

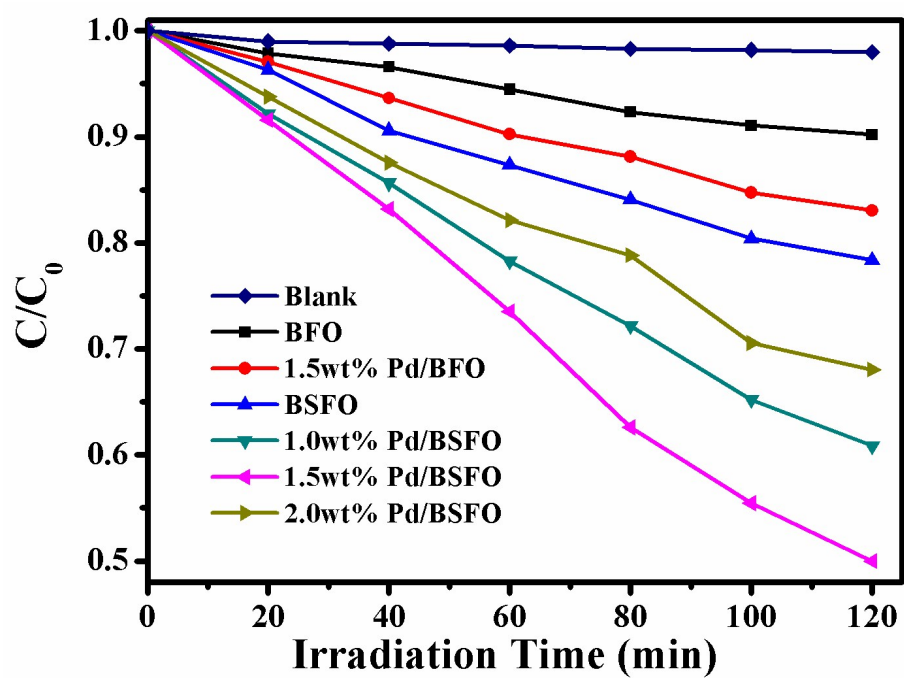

**Fig. S1.** Photocatalytic degradation of phenol as a function of the irradiation time under visible light ( $\lambda \geq 420$  nm) irradiation for different photocatalyst samples.

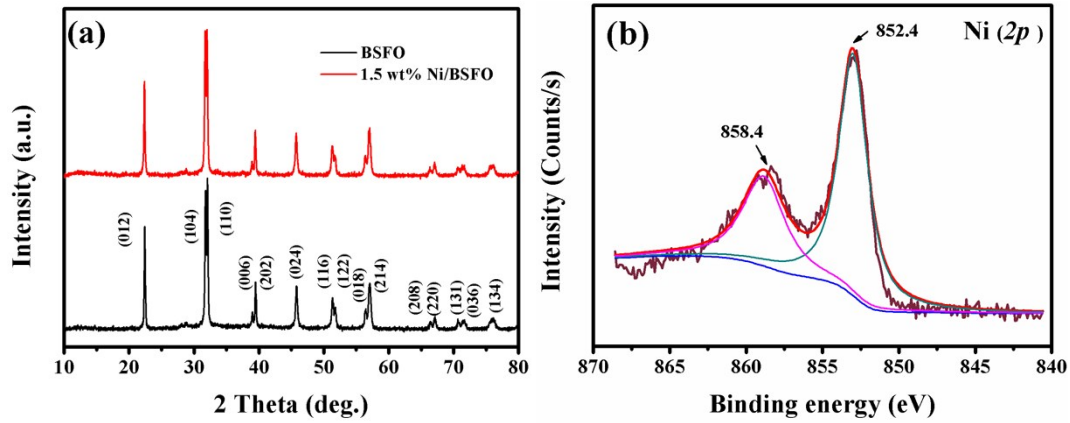

**Fig. S2.** (a) XRD patterns of the synthesized BSFO and 1.5 wt% Ni/BSFO samples; (b) XPS spectra of Ni element for the 1.5 wt% Ni/BSFO sample.

Fig. S2(a) shows the XRD patterns of the prepared BSFO and 1.5 wt% Ni/BSFO samples. It can be seen that the diffraction peaks of the prepared 1.5 wt% Ni/BSFO sample matched well with the rhombohedral perovskite structure with the space group of R3c (JCPDF No.86-1518), which was in good agreement with those of the prepared BSFO. Meanwhile, no diffraction peaks of Ni were observed in the prepared 1.5 wt% Ni/BSFO sample, due to the relatively low concentration of Ni [1]. In order to clarify the chemical state of Ni element in the 1.5 wt% Ni/BSFO sample, the X-ray photoelectron spectroscopy (XPS) was applied. The XPS core level spectrum of Ni 2*p* is shown in Fig. S2(b). The binding energies located at 852.4 and 859.4 eV could be identified as the 2*p*<sub>3/2</sub> of metallic Ni [2], confirming the presence of metallic Ni in the as-prepared 1.5 wt% Ni/BSFO sample.

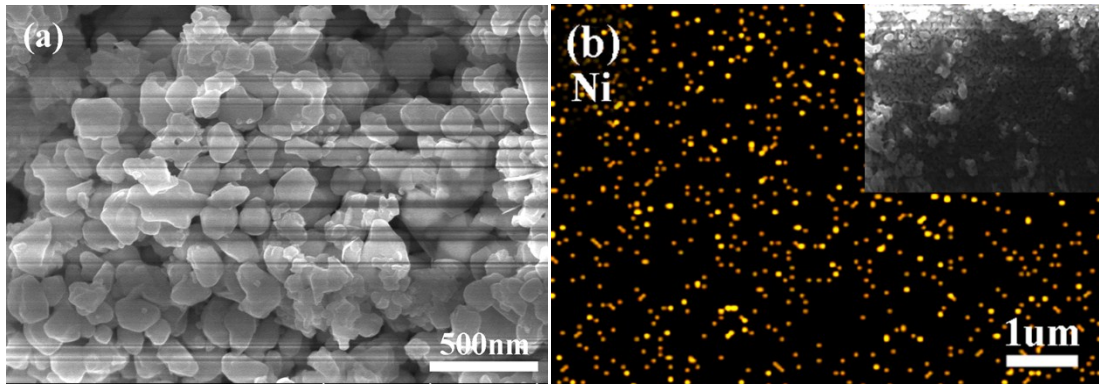

**Fig. S3.** (a) SEM micrograph of the 1.5 wt% Ni/BSFO sample; (b) EDX distribution map of Ni element (Inset: the corresponding SEM micrograph of the 1.5 wt% Ni/BSFO sample).

Fig. S3(a) shows the typical SEM image of the obtained 1.5 wt% Ni/BSFO sample. As shown, the sample was composed of irregular nanoparticles with a grain size of 100 ~ 150 nm. As presented in Fig. S3(b), the dispersion state of yellow dots representing Ni element were well-proportioned, indicating a well dispersion of Ni on the surface of BSFO.

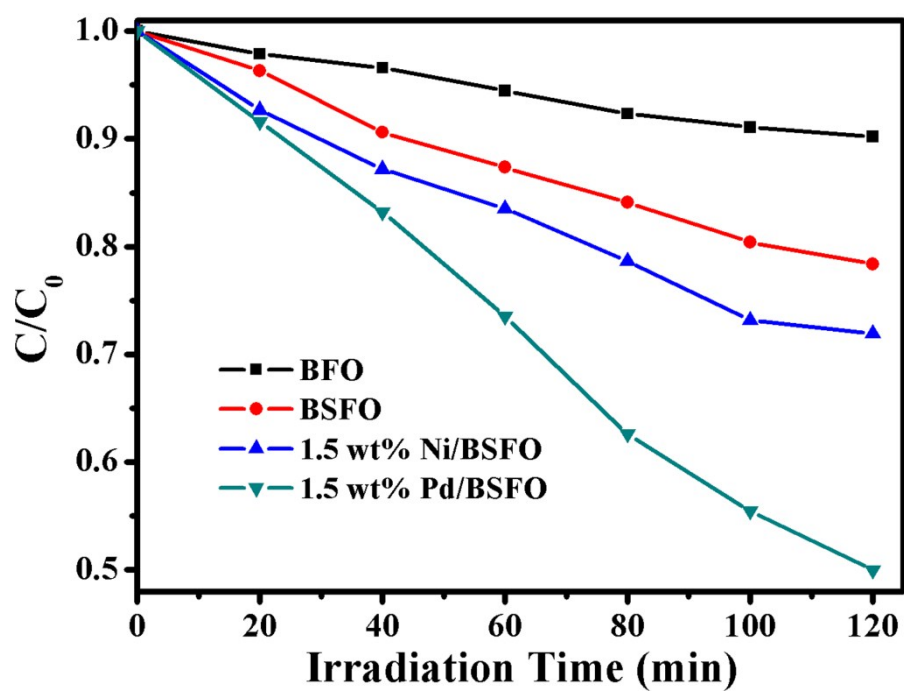

**Fig. S4** Photocatalytic degradation of phenol with 1.5 wt% Ni/BFO and 1.5 wt% Ni/BSFO samples in 2 h under visible light irradiation.

## ***Reference***

- [1] S. Onsuratoom, T. Puangpetch, S. Chavadej, Comparative investigation of hydrogen production over Ag-, Ni-, and Cu-loaded mesoporous-assembled TiO<sub>2</sub>-ZrO<sub>2</sub> mixed oxide nanocrystal photocatalysts, *Chem. Eng. J.* 173 (2011) 667–675.
- [2] H. C. He, P. Xiao, M. Zhou, Y. H. Zhang, Q. Lou, X. Z. Dong, Boosting catalytic activity with a p-n junction: Ni/TiO<sub>2</sub> nanotube arrays composite catalyst for methanol oxidation, *Int. J. Hydrogen Energ.* 37 (2012) 4967-4973.
